# Supplementary material for: Nanoristors: highly uniform, sub-500-millivolt, large-scale, and robust molybdenum disulfide nanograined memristors
Source: Royal Society of Chemistry journal article supplement (doi:10.1039/d3tc04265k), 2024-01-01
Supplement: d3tc04265k1.pdf [file d3tc04265k1.pdf]

**Supporting Information for**

# Nanoristors: Highly Uniform, Sub-500-Millivolt, Large-Scale, and Robust Molybdenum Disulfide Nanograined Memristors

*Gunhoo Woo,<sup>a,\*</sup> Hyeong-U Kim,<sup>b,\*</sup> Byung Chul Jang,<sup>c,\*</sup> Muhammad Naqi,<sup>d</sup> Seongin Hong,<sup>e</sup> Arindam Bala,<sup>d</sup> Seunghun Kang,<sup>d</sup> Yunseok Kim,<sup>d</sup> Sunkook Kim,<sup>d,†</sup> Taesung Kim,<sup>a,f,†</sup> Jae-Joon Kim<sup>g,†</sup> and Hocheon Yoo<sup>h,†</sup>*

*<sup>a</sup>SKKU Advanced Institute of Nanotechnology, Sungkyunkwan University (SKKU), Suwon, Republic of Korea*

*E-mail: tkim@skku.edu*

*<sup>b</sup>Plasma Engineering Laboratory, Korea Institute of Machinery and Materials (KIMM), Daejeon, Republic of Korea Address here.*

*<sup>c</sup>School of Electronics and Electrical Engineering, Kyungpook National University, 41566 80 Daehakro, Bukgu, Daegu, Republic of Korea*

*<sup>d</sup>School of Advanced Material Science and Engineering, Sungkyunkwan University (SKKU), Suwon, Republic of Korea*

*E-mail: seonkuk@skku.edu*

*<sup>e</sup>Department of Physics, Gachon University, Seongnam13120, Republic of Korea*

*<sup>f</sup>School of Mechanical Engineering, Sungkyunkwan University (SKKU), Suwon, Republic of Korea.*

*<sup>g</sup>Department of Electrical and Computer Engineering and Inter-university Semiconductor Research Center, Seoul National University, Seoul 08826, Republic of Korea*

*E-mail: kimjaejoon@snu.ac.kr*

*<sup>h</sup>Department of Electronic Engineering, Gachon University, Seongnam, Republic of Korea*

*E-mail: hyoo@gachon.ac.kr*

*\* These authors contributed equally to this work.*

*†Corresponding authors: seonkuk@skku.edu, tkim@skku.edu, kimjaejoon@snu.ac.kr, hyoo@gachon.ac.kr*

## Index

**Fig. S1** Performance comparison of the proposed device with previous work.

**Fig. S2** HRTEM cross-section view of the MoS<sub>2</sub> prepared to depend on Ar/H<sub>2</sub>S injected gas ratio.

**Fig. S3** Time-dependent HR-TEM cross-section view images of the MoS<sub>2</sub>

**Fig. S4** Image of 4-inch scale PECVD grown MoS<sub>2</sub> layer synthesized on the SiO<sub>2</sub>/Si wafer.

**Fig. S5** Raman spectra of (a) the PECVD-grown MoS<sub>2</sub> and (b) CVD-grown MoS<sub>2</sub>.

**Fig. S6** Raman mapping image of MoS<sub>2</sub> layer (20 μm × 20 μm size).

**Fig. S7** XRD result of the PECVD grown nanograin MoS<sub>2</sub>

**Fig. S8.** The roughness average (Ra) of a measured current value for the pristine state, LRS state, and HRS state.

**Fig. S9** Switching polarity control by swapping the applied voltage.

**Fig. S10** Characterization of the MoS<sub>2</sub> nanoristor device with various conditions.

**Fig. S11** Memristive performance comparison with CVD-grown MoS<sub>2</sub> base memristor device.

**Fig. S12** Optical image of Nanoristors depending on metal line width of electrodes

**Fig. S13** 5 cycles I-V curves along to width of the electrode.

**Fig. S14** The switching current ratio ( $I_{LRS}/I_{HRS}$ ) as a function of electrode linewidth (3 to 10 μm).

**Fig. S15** The result of conductance updates for the nanoristor with varying the electrodes linewidth.

**Fig. S16** Read-disturb immunity characteristics during the depression process.

**Fig. S17** I-V curve of the nanoristor operated in pulse programming mode.

**Fig. S18** Device-to-system simulation for the face classification.

**Fig. S19** Synaptic plasticity of MoS<sub>2</sub> nanoristor and its fitting curve

**Fig. S20** Water transfer process.

**Fig. S21** SEM images of the cantilever tip used in CAFM measurement

**Table S1.** Comparison of memristor performance with previous research.

**Table S2.** Summarized fitting parameters.

**Supplementary information 1.** The ANN simulation process

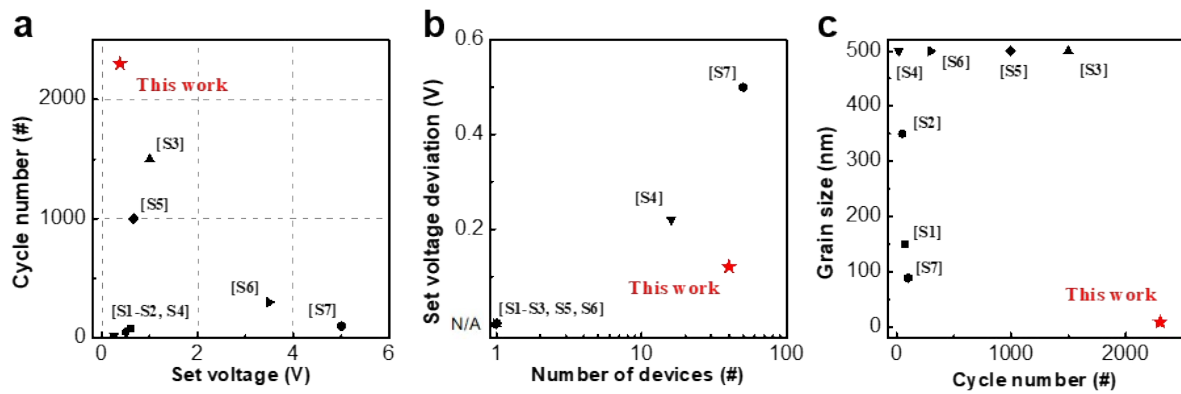

**Fig. S1** Performance comparison of the proposed device with previous work. (a) Plot of cycle number versus set voltage, and (b) plot of set voltage deviation versus number of devices. (c) Plot of grain size versus cycle numbers.

**Table S1.** Comparison of memristor performance with previous research.

| Structure                                            | Set (V) | Reset (V) | Endurance cycles (pulse)                             | Retention time(s)   | Fabrication Methods | Uniformity (set/reset)(V) | Scale                   | Year | Ref.              |
|------------------------------------------------------|---------|-----------|------------------------------------------------------|---------------------|---------------------|---------------------------|-------------------------|------|-------------------|
| Ag/ MoS <sub>2</sub> (PECVD)/Au                      | -0.38   | 0.28      | $\sim 2.2 \times 10^3$<br>( $\sim 5.3 \times 10^5$ ) | $> 2.5 \times 10^4$ | PECVD               | $\pm 0.12/\pm 0.04$       | Large-area (40 devices) | 2023 | This work         |
| Pd/WS <sub>2</sub> /Pt                               | 0.60    | -0.20     | 75                                                   | $3.5 \times 10^3$   | liquid dispersion   | N/A                       | Flake (1 device)        | 2019 | Ref <sup>S1</sup> |
| ITO/BP@PS/ITO                                        | - 0.50  | 2 .00     | 50                                                   | $10^4$              | liquid dispersion   | N/A                       | Large-area (1 device)   | 2020 | Ref <sup>S2</sup> |
| MoS <sub>2</sub> /NbS <sub>2</sub> /NbO <sub>x</sub> | 1.00    | -1.00     | $1.5 \times 10^3$                                    | $3.6 \times 10^4$   | CVD                 | N/A                       | Flake (1 device)        | 2020 | Ref <sup>S3</sup> |
| Cu/MoS <sub>2</sub> /Au                              | 0.25    | -0.15     | 20                                                   | $1.8 \times 10^4$   | MOCVD               | $\pm 0.22/\pm 0.14$       | Large-area (16 devices) | 2019 | Ref <sup>S4</sup> |
| Ag/1T-MoS <sub>2</sub> /Ag                           | 0.66    | -0.98     | $10^3$                                               | N/A                 | exfoliation         | N/A                       | Flake (1 device)        | 2019 | Ref <sup>S5</sup> |
| Au/Ti/Gr/h-BN/Gr/Au                                  | 3.50    | -1.00     | $3 \times 10^2$                                      | N/A                 | CVD                 | N/A                       | Large-area              | 2019 | Ref <sup>S6</sup> |
| Al/MoS <sub>2</sub> -MoO <sub>x</sub> /Al (unipolar) | -5.00   | -0.50     | $10^2$                                               | $10^4$              | colloidal synthesis | $\pm 0.5/\pm 0.3$         | Large-area (50 devices) | 2018 | Ref <sup>S7</sup> |

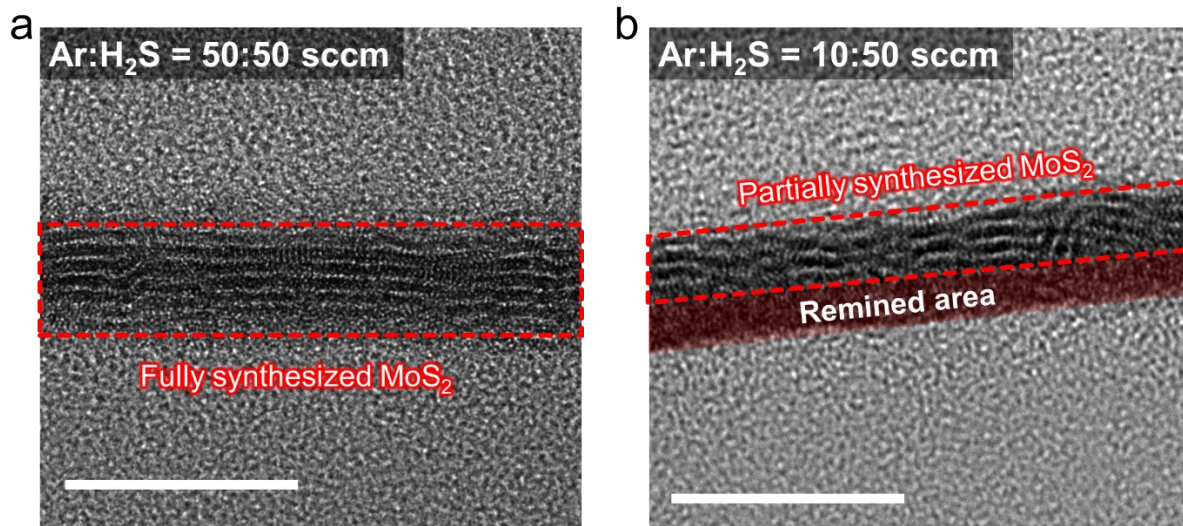

**Fig. S2** HRTEM cross-section view of the MoS<sub>2</sub> prepared at the condition of (a) Ar:H<sub>2</sub>S = 50:50 sccm, (b) Ar:H<sub>2</sub>S = 10:50 sccm. (scale bar = 10 nm)

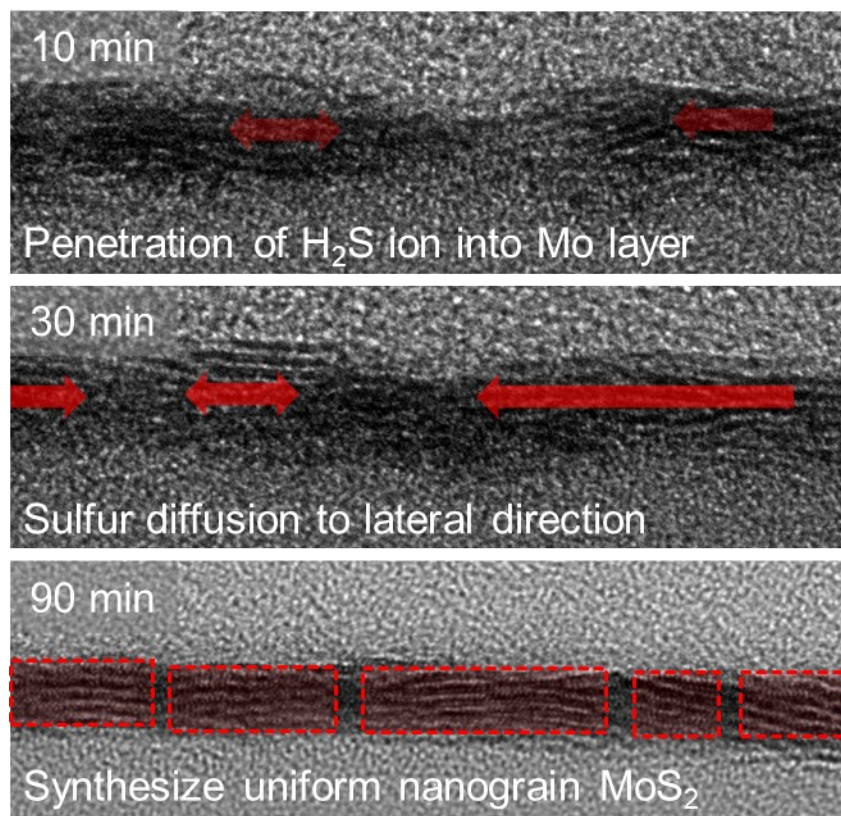

**Fig. S3** HR-TEM cross-section view images of the MoS<sub>2</sub> synthesized for (a) 10 min, (b) 30 min, and (c) 90 min.

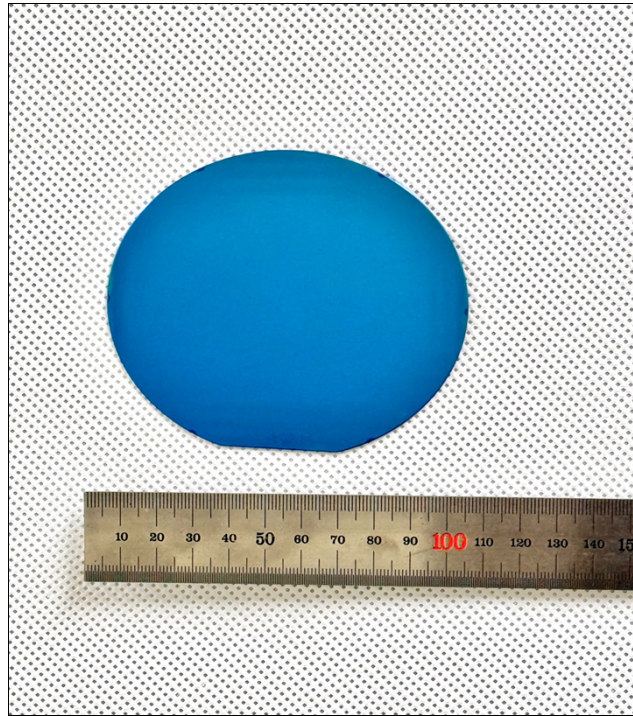

**Fig. S4** Image of 4-inch scale PECVD grown MoS<sub>2</sub> layer synthesized on the SiO<sub>2</sub>/Si wafer.

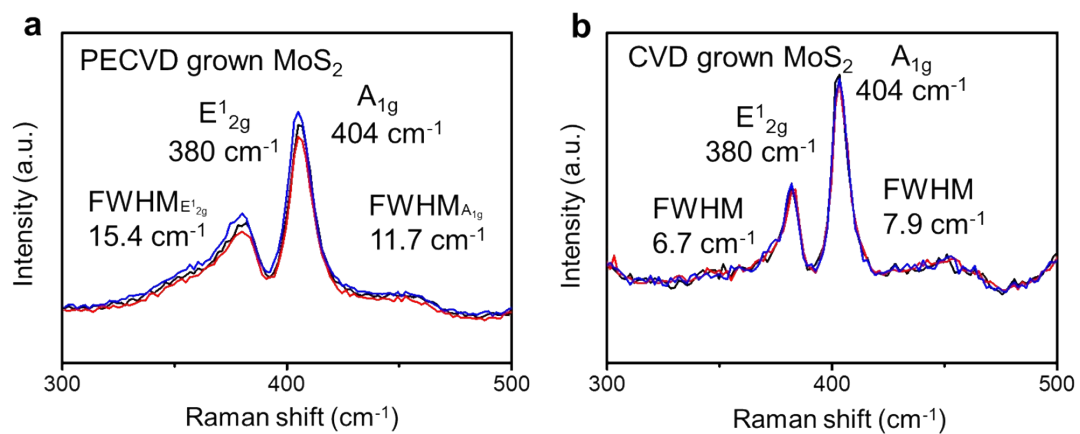

**Fig. S5** Raman spectra of (a) the PECVD-grown MoS<sub>2</sub> and (b) CVD-grown MoS<sub>2</sub>.



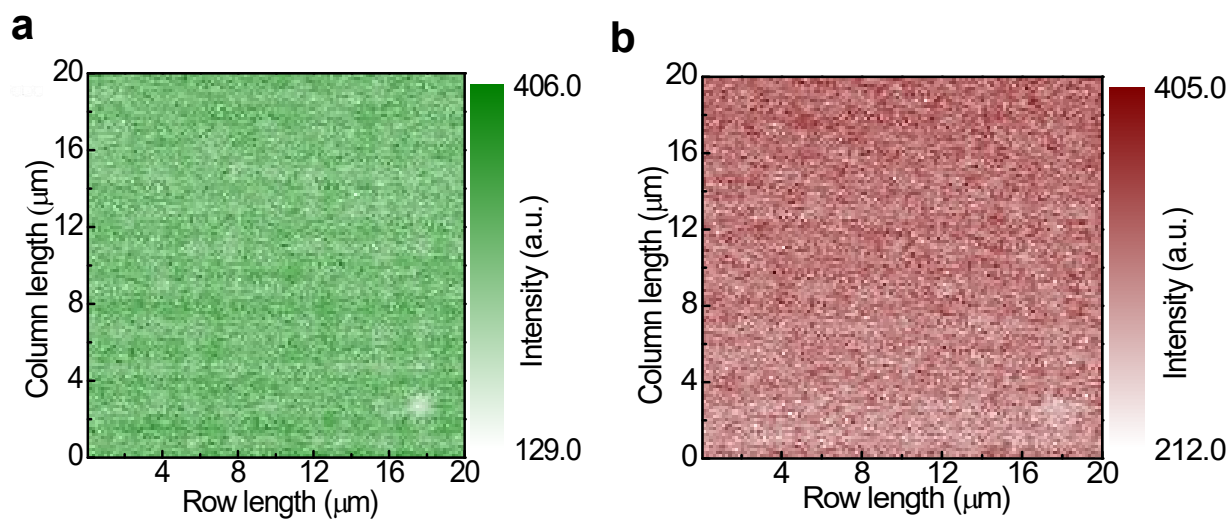

**Fig. S6** Raman mapping image of  $\text{MoS}_2$  layer (20  $\mu\text{m} \times 20 \mu\text{m}$  size). (a)  $A_{1g}$  and (b)  $E_{2g}^1$  mode.

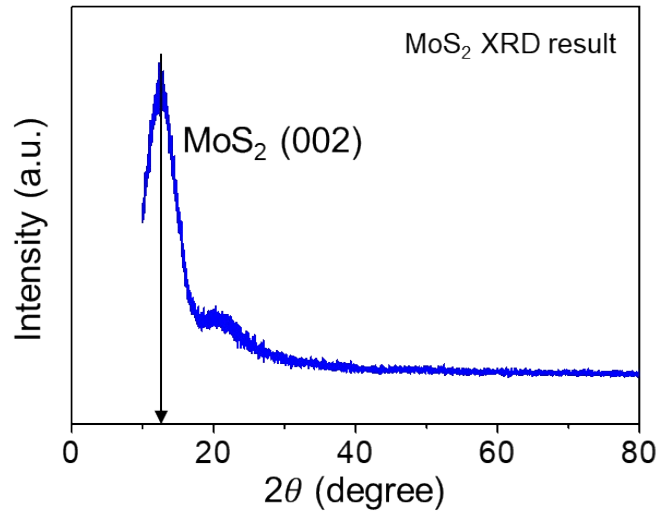

**Fig. S7** XRD result of the PECVD grown nanograin MoS<sub>2</sub> which the grain size is estimated as 4.0 nm scale.

The grain size of nanograin MoS<sub>2</sub> is calculated with the Scherrer formula:

$$D_p = \frac{0.94 \lambda}{\beta \cos \theta}$$

Where  $D_p$  is average crystalline size,  $\beta$  is line broadening in radians,  $\theta$  = Bragg angle,  $\lambda$  = X-ray wavelength. In this case, we calculated the grain size using the peak at 13.1 degree which is closely related to MoS<sub>2</sub> crystal. The full width at Half Maximum (FWHM) is inserted in  $\beta$ , and  $\lambda$  is 0.16418. Consequently, the grain size is estimated as 4.00 nm, showing a significantly matched value with the TEM result.

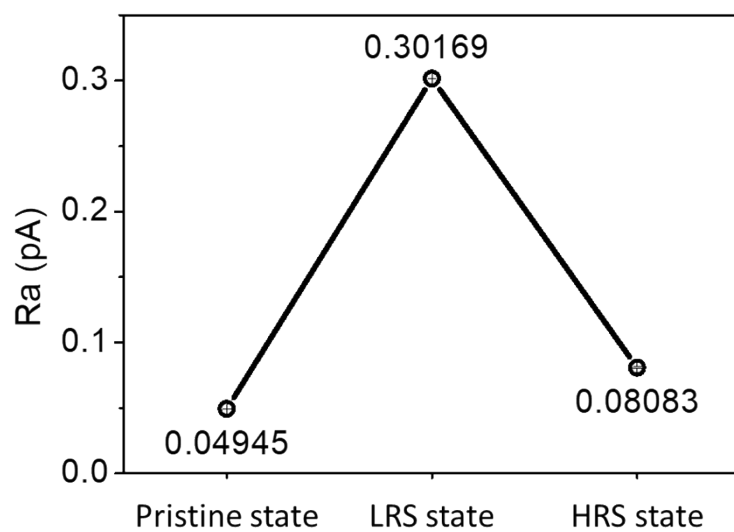

**Fig. S8** The roughness average (Ra) of a measured current value for the pristine state, LRS state, and HRS state.

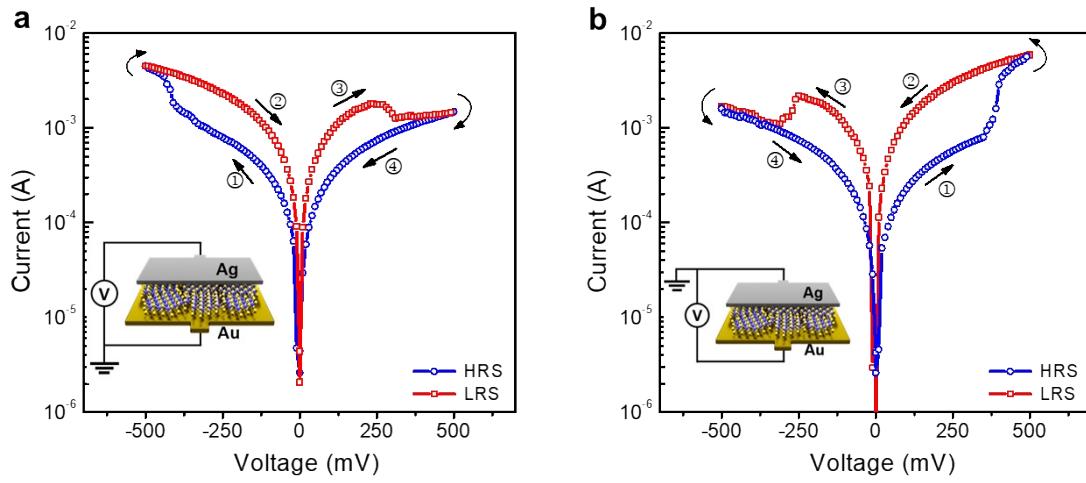

**Fig. S9** Switching polarity control by swapping the applied voltage. (a) Au electrode set as ground, and (b) silver electrode set as ground.

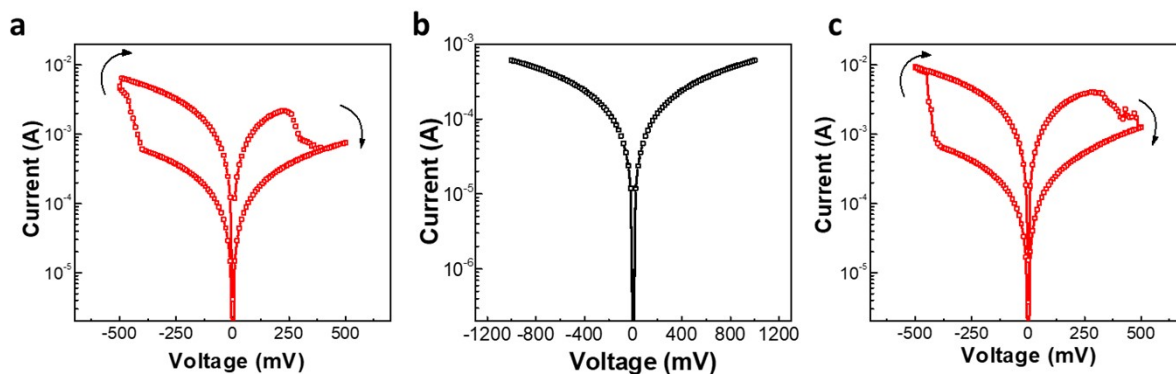

**Fig. S10** Characterization of the MoS<sub>2</sub> nanoristor device with various conditions. (a) 20 times sweeping voltage from -0.5 V to 0.5 V of the MoS<sub>2</sub> nanoristor in the vacuum state. (b) 10 times sweeping voltage from -1 V to 1 V of the Au/Ti/MoS<sub>2</sub>/Au/Ti vertical structure. (c) Current behavior of the nanoristor which is fabricated on PI-substrate (sweeping voltage range: -0.5 V to 0.5 V)

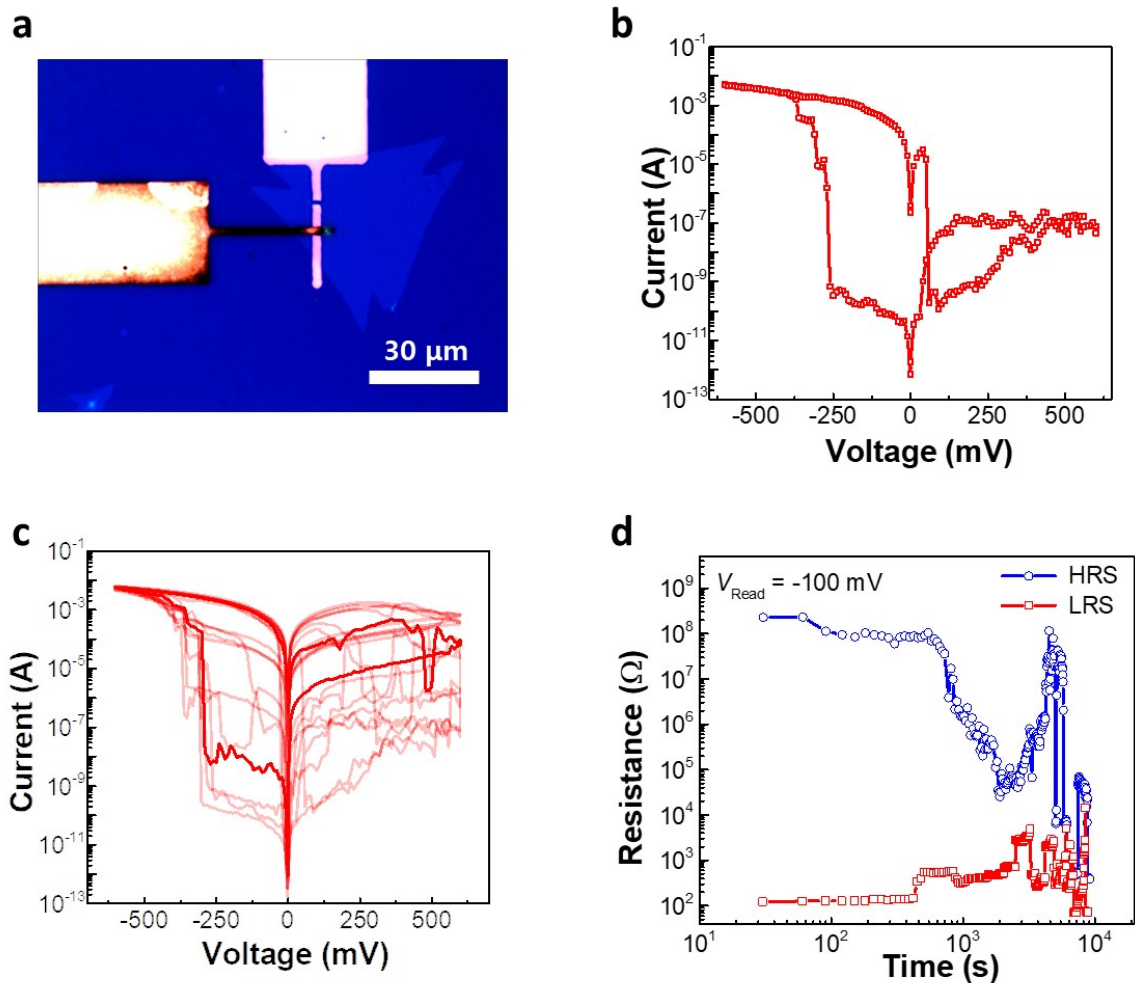

**Fig. S11** (a) Optical image of memristor based on CVD-grown MoS<sub>2</sub>. (Scale bar: 30 μm). (b) Typical *I-V* curve of CVD-grown MoS<sub>2</sub> memristor. (c) Bipolar switching curve of CVD-grown memristor with 10 times cumulative sweep. (d) Measured retention about 10<sup>4</sup> retention time at -100 mV read voltage.

To compare with the proposed nanograin MoS<sub>2</sub> memristor device, single crystalline MoS<sub>2</sub> was synthesized by chemical vapor deposition (CVD) process. CVD-grown MoS<sub>2</sub> (micrometer-sized grains) was transferred on patterned Au/Ti (50 nm/5 nm) bottom electrode (BEs) and top electrode (TEs) patterned of Ag (50 nm) was subsequently patterned by lift-off process mentioned in experimental section. The fabricated triangle shaped CVD-grown MoS<sub>2</sub> memristor device has a line width of 3 μm, shown in Fig. S5(a), S5(b) and S5(c) show a

bipolar switching and 10 times sweep I-V curve of CVD-grown MoS<sub>2</sub> with set voltage ( $V_{\text{set}}$ ) = -260 mV. However, the CVD-grown MoS<sub>2</sub> memristor exhibit unstable device performance with unclear reset voltage ( $V_{\text{reset}}$ ) and poor repeatability in comparison to the proposed nanoristor device. Furthermore, the retention characteristics also showed instability in which the resistance state was not stably maintained in the CVD-grown MoS<sub>2</sub> memristor (Fig. S5d). Based on the above results, it is concluded that larger grain size and lack of defect sites in the CVD-grown MoS<sub>2</sub> resulted in the unstable memristive operation.

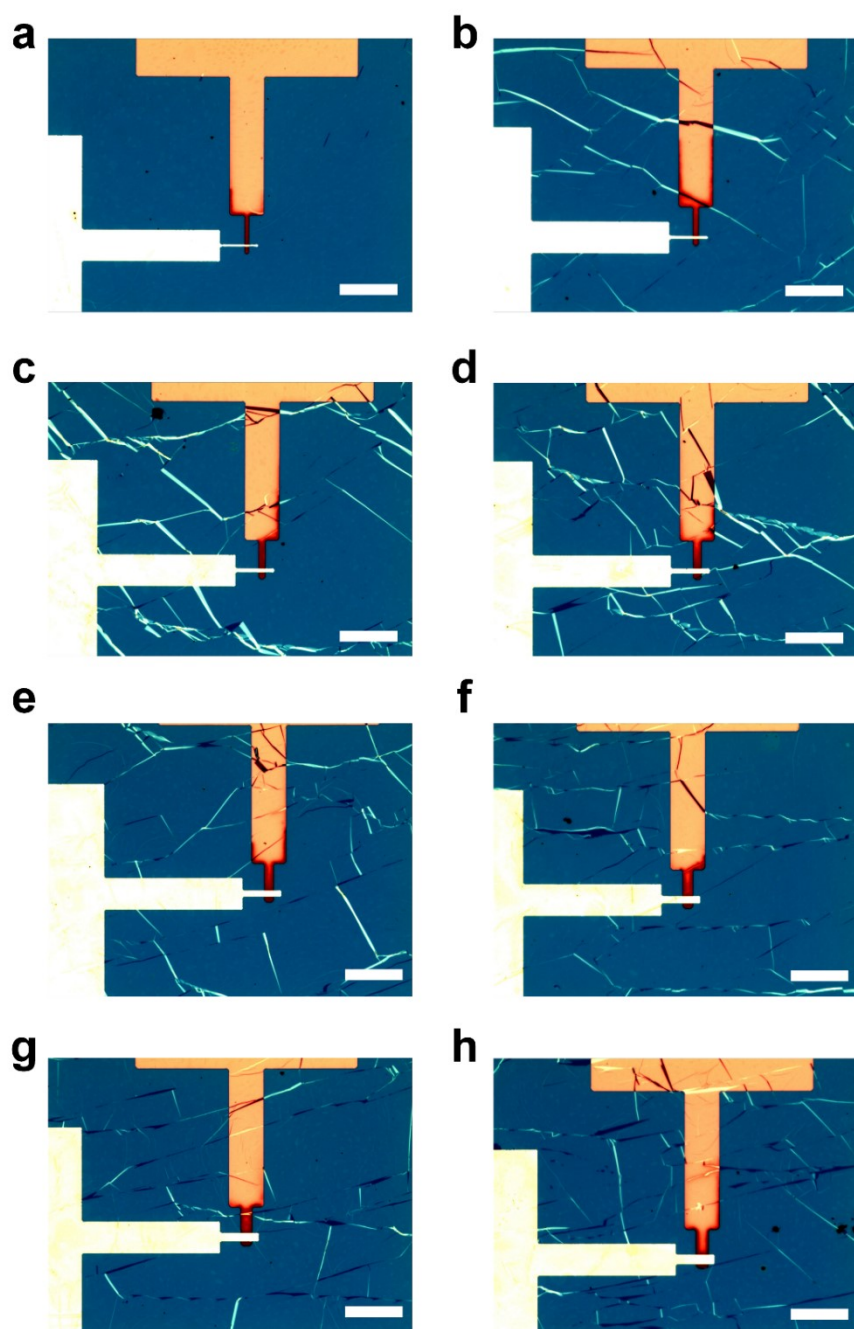

**Fig. S12** Optical image of Nanoristors depending on metal line width of electrodes (Scale bar: 50  $\mu\text{m}$ ). (a) 3  $\mu\text{m}$ , (b) 4  $\mu\text{m}$ , (c) 5  $\mu\text{m}$ , (d) 6  $\mu\text{m}$ , (e) 7  $\mu\text{m}$ , (f) 8  $\mu\text{m}$ , (g) 9  $\mu\text{m}$ , and (h) 10  $\mu\text{m}$ .



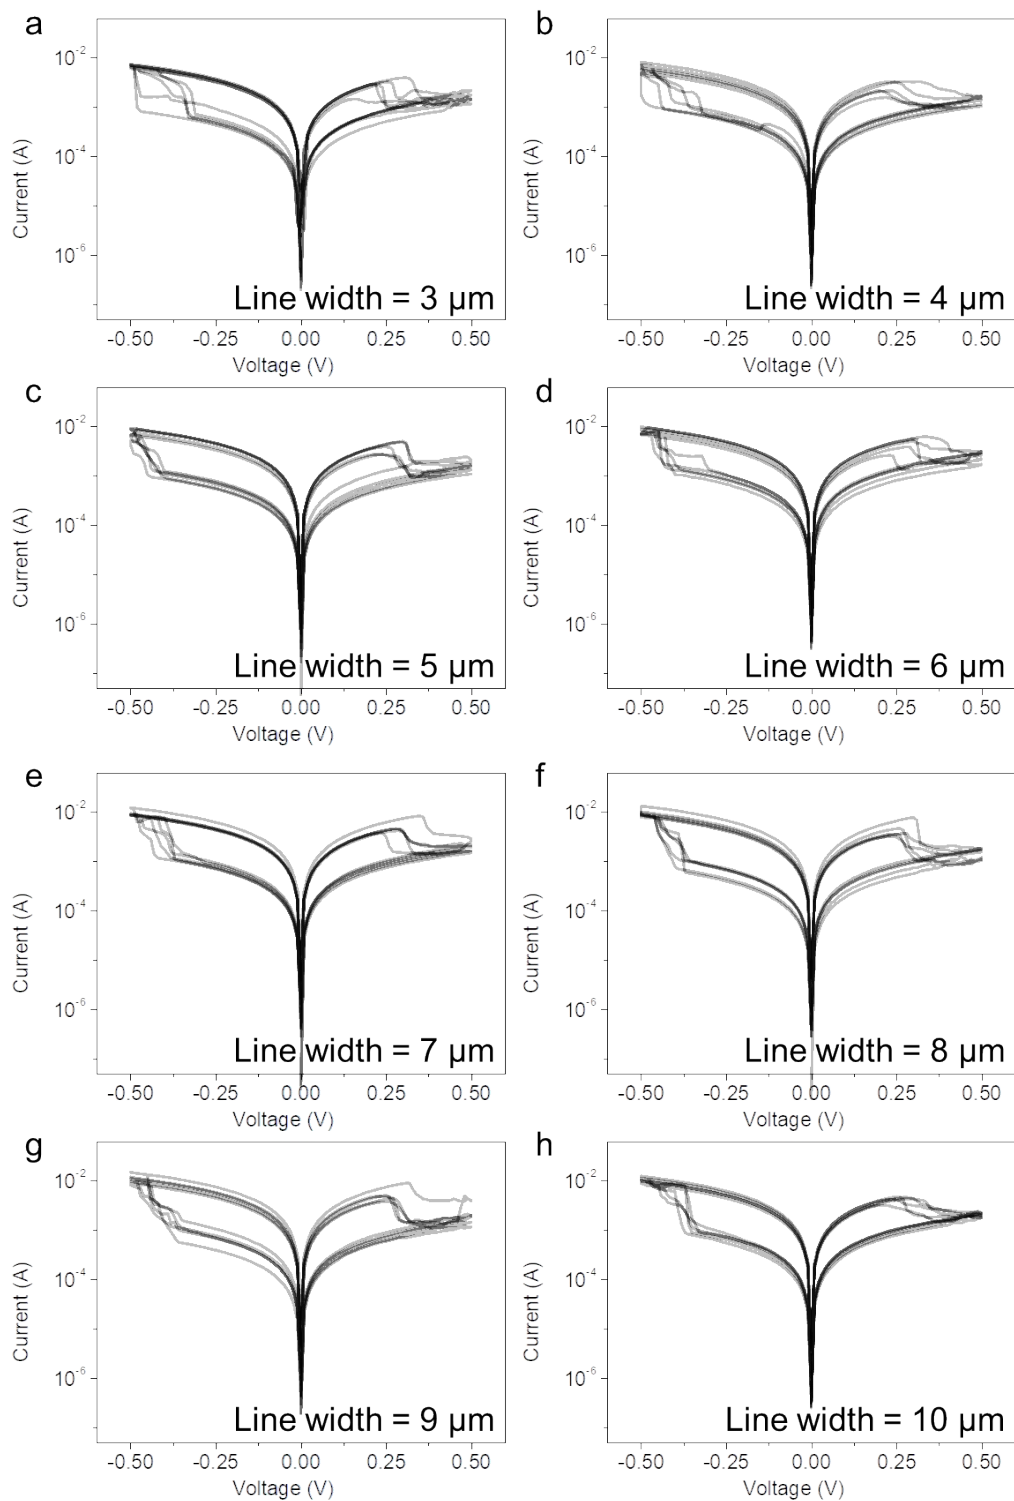

**Fig. S13** 5 cycles I-V curves along to width of the electrode. (a) 3  $\mu\text{m}$ , (b) 4  $\mu\text{m}$ , (c) 5  $\mu\text{m}$ , (d) 6  $\mu\text{m}$ , (e) 7  $\mu\text{m}$ , (f) 8  $\mu\text{m}$ , (g) 9  $\mu\text{m}$ , and (h) 10  $\mu\text{m}$ .

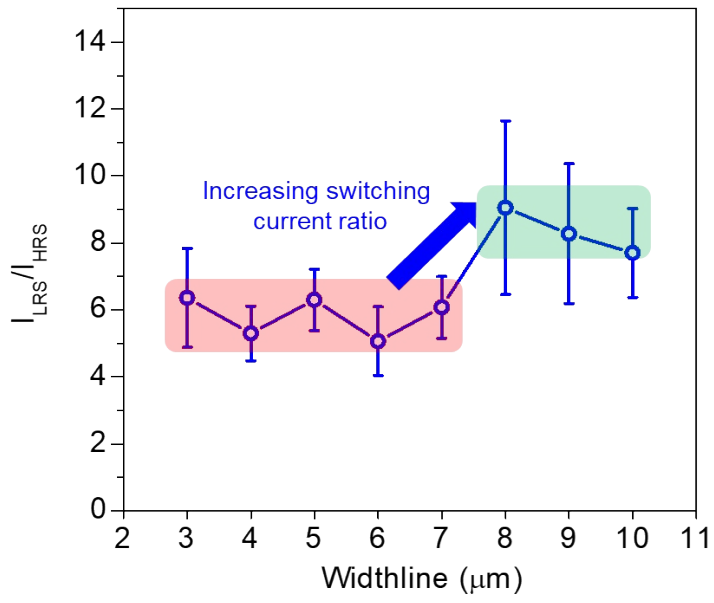

**Fig. S14** The switching current ratio ( $I_{LRS}/I_{HRS}$ ) as a function of electrode linewidth (3 to 10  $\mu\text{m}$ ).

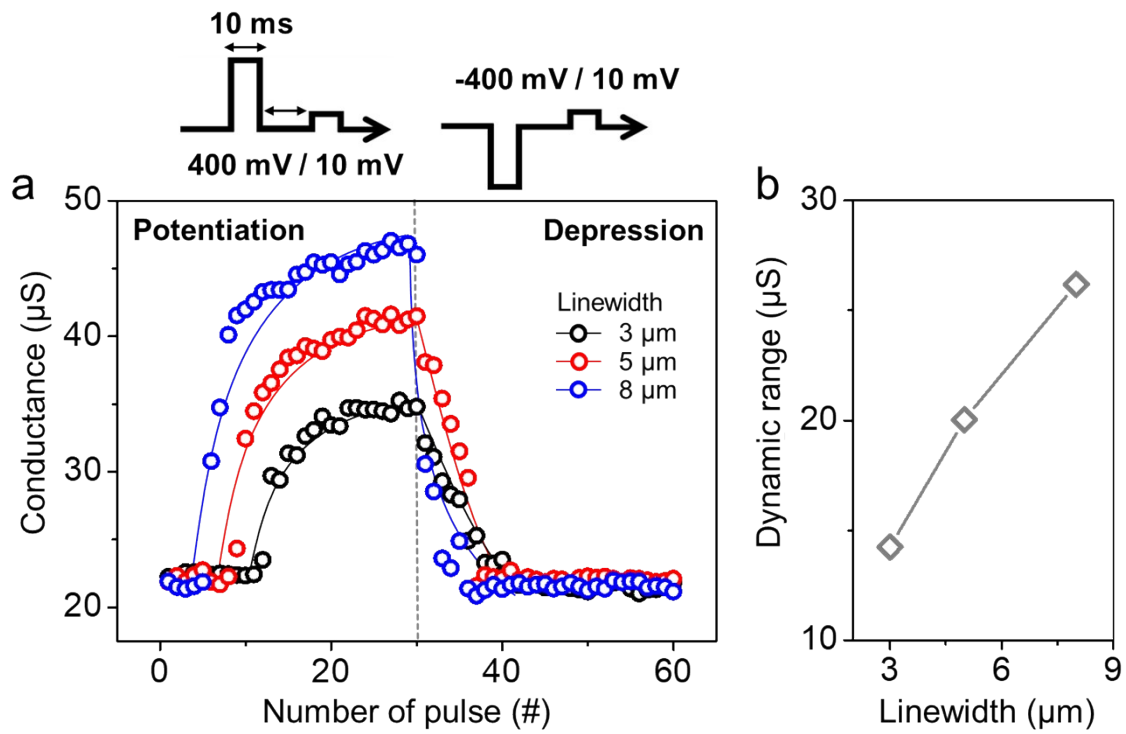

**Fig. S15** (a) The result of conductance updates for the nanoristor with varying the electrodes linewidth (3, 5, and 8  $\mu\text{m}$ ). (b) Extracted dynamic range from the LTP/LTD curves measured under various electrode dimension conditions.

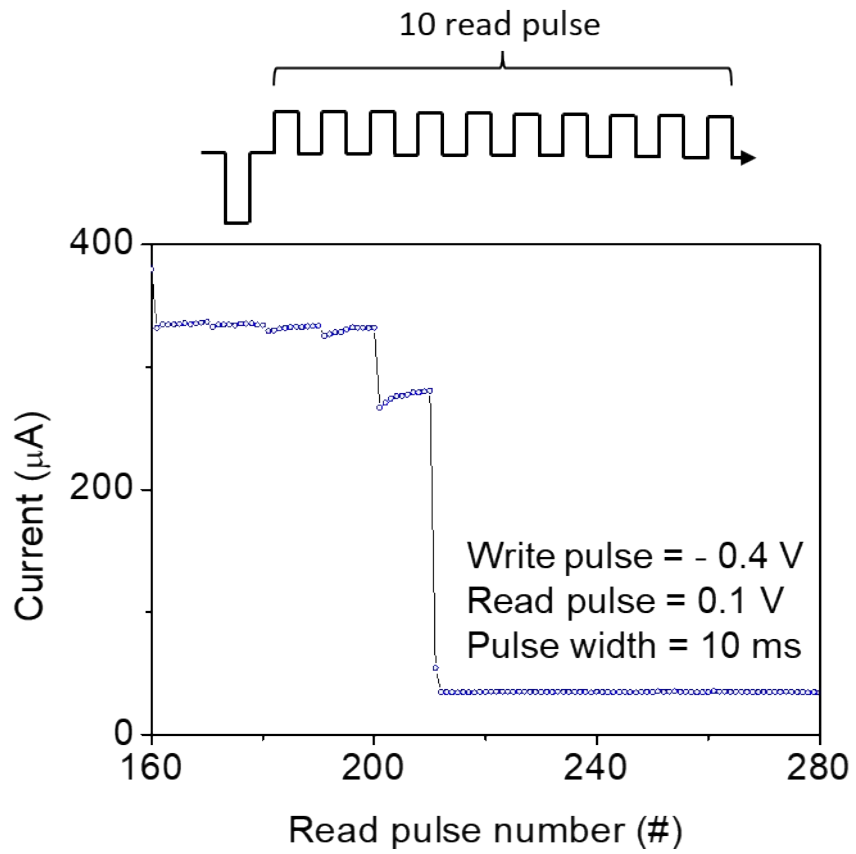

**Fig. S16** Read-disturb immunity characteristics during the depression process.

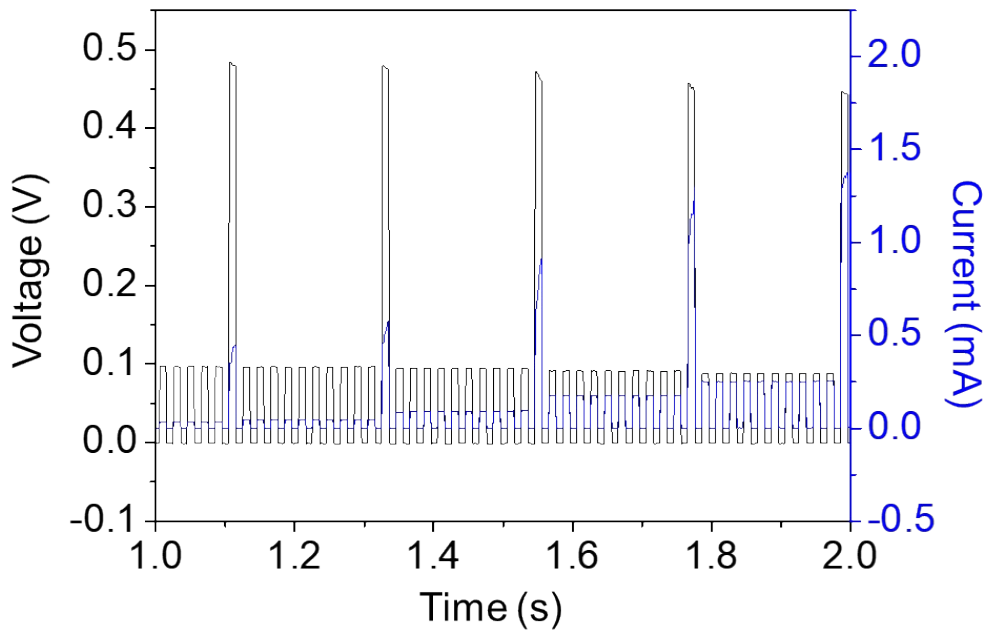

**Fig. S17** *I-V* curve of the nanoristor operated in pulse programming mode.

The energy consumption during the programming and erasing can be estimated with the following equation:

$$E = V \times I \times T_{pulse\ width}$$

Here,  $E$  denote the energy consumption of the nanoristor during the programming and erasing process.  $V$ ,  $I$ , and  $T_{pulse\ width}$  means applied voltage, drain current, and pulse width, respectively. The read and write energy consumption of the nanoristor is estimated as 44.4 nJ for reading and 2.10  $\mu$ J for writing.

### Supplementary information 1. The ANN simulation process

For the device-to-system simulation, we designed a two-perceptron artificial neural network (ANN) system for face recognition. The ANN with two crossbar architectures consists of 1024 input neuron layers, 20 middle neuron layers, and 3 output neuron layers, as shown in Fig. S18(a). In the face recognition system, an image sensor detects a human face and the detected pixels are converted into presynaptic spikes ( $V_{pre}$ ) with delayed pulse timing to encode the analog information of pixel intensities (Fig. S18(b)).

In the input neuron layer, the input neurons consist of a waveform generator connecting the image sensor and a CMOS inverter. The 1024 input neurons are connected to pixels in the face image to emit  $V_{pre}$ . As shown in Fig. S18(a), the presynaptic spikes ( $V_{pre}$ ) emitted from the input neurons trigger the MoS<sub>2</sub> nanoristor-based synapse devices connected with the postsynaptic neurons to induce postsynaptic currents ( $I_{post}$ ) based on the conductance of MoS<sub>2</sub> nanoristor. The  $I_{post}$  are integrated at a leaky integrator in the postsynaptic neuron. When the output voltage of the leaky integrator by the accumulated  $I_{post}$  is higher than a threshold voltage ( $V_{th}$ ), the postsynaptic neuron utilizes a feedback network to fire a postsynaptic spike ( $V_{post}$ ) through the waveform generator. Subsequently, the synaptic weights between the input neuron and the middle neurons can be updated using the correlation of the presynaptic and postsynaptic spikes by the STDP learning rule. This process clusters similar human images. Furthermore, the  $V_{pre}$  emitted from the input neurons also trigger MoS<sub>2</sub> nanoristors between the middle and output neurons, integrating  $I_{post}$  at the leaky integrators in the output neurons. The corresponding target value determined by a specific person's label to classify a human's face image is given for each training process as follows: the corresponding target value is loaded to the lower  $V_{th}$  at the comparator of the corresponding target output neuron and into the higher  $V_{th}$  at the other output neurons. Then, the target output neuron with the low  $V_{th}$  and

other output neurons with the high  $V_{th}$  emit the  $V_{pot}$  for the potentiation process and the  $V_{dep}$  for the depression process into MoS<sub>2</sub> nanoristors between the middle and the output neurons, respectively. If an output neuron generates a  $V_{post}$ , it also sends inhibitory signals to other neurons in the output layer in order to prevent the other neurons from firing during the refractory time. This lateral inhibition enables to prevent all neurons from learning in a similar image. It also promotes competitive learning that corresponds to a winner-takes-all mechanism.

The delayed timing of the presynaptic spike ( $t_{pre}$ ) is encoded from 0 to 20  $\mu$ s proportional to the intensity of the image pixel (Fig. S18(b)). In the input neuron, a specific voltage can be applied to MoS<sub>2</sub> nanoristors through the CMOS inverter. The  $V_{dd}$  of PMOS in the CMOS inverter corresponds to a reading voltage ( $V_{Read}$ ) of -0.1 V, while  $V_{ss}$  of NMOS corresponds to the  $V_{post}$  emitted by the following neuron. The applied voltage to MoS<sub>2</sub> nanoristors-based synapse device ( $V_{syn}$ ) depends on the timing difference ( $\Delta t = t_{pre} - t_{pst}$ ) of the  $V_{pe}$  and  $V_{pst}$  via CMOS inverter. Hence, the correlation between  $V_{pre}$  and  $V_{post}$  induces either the potentiation process ( $\Delta t > 0$ ) or the depression process ( $\Delta t < 0$ ) of MoS<sub>2</sub> nanoristors.

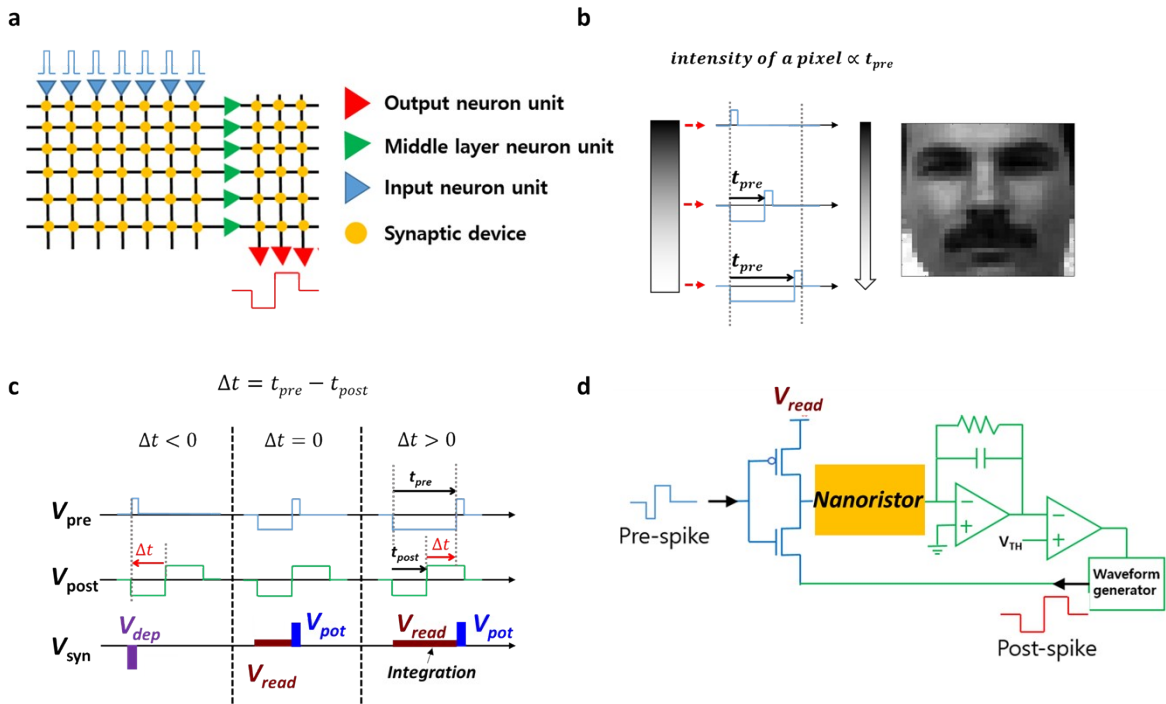

**Fig. S18** Device-to-system simulation for the face classification. (a) Two-crossbar array architecture for two-perceptron ANN. (b) The timing of the pre-spike encoded by the intensity of the input pixel. (c) The designed overlapping pulse scheme to implement the simplified STDP scheme. (d) Circuit diagram of the neuron circuit.



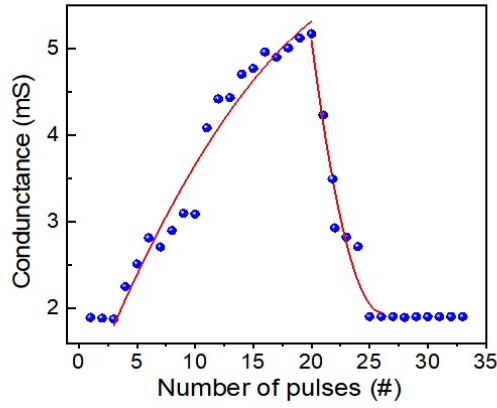

**Fig. S19** Synaptic plasticity of MoS<sub>2</sub> nanoristor and its fitting curve

In the device-to-system simulation, we mathematically modeled the conductance modulation of MoS<sub>2</sub> nanoristors as a function of the number of pulses to update the synaptic weights according to the experimentally measured synaptic plasticity of MoS<sub>2</sub> nanoristors shown in Figure 5a (Figure S13). The conductance modulation ( $\Delta G$ ) results from the simplified STDP model, indicating that  $\Delta G$  relies only on the present conductance ( $G_{\text{present}}$ ). The following equation can be derived from the fitted curve using experimental data:

$\Delta G$

$$= \left[ \left( G_{\text{HGS}_p}^{a_p} - G_{\text{LGS}_p}^{a_p} \right) \cdot \left\{ \left( G_{\text{present}} \cdot 10^{3 \cdot a_p} - G_{\text{LGS}_p}^{a_p} \right) / \left( G_{\text{HGS}_p}^{a_p} - G_{\text{LGS}_p}^{a_p} \right) + 1/19 \right\} + G_{\text{LGS}_p}^{a_p} \right] / G_{\text{present}}$$

(in potentiation)

$\Delta G$

$$= \left[ \left( G_{\text{HGS}_d}^{a_d} - G_{\text{LGS}_d}^{a_d} \right) \cdot \left\{ \left( G_{\text{present}} \cdot 10^{3 \cdot a_d} - G_{\text{LGS}_d}^{a_d} \right) / \left( G_{\text{HGS}_d}^{a_d} - G_{\text{LGS}_d}^{a_d} \right) - 1/19 \right\} + G_{\text{LGS}_d}^{a_d} \right] / G_{\text{present}}$$

(in depression)

where  $G_{\text{HGS}_p}$  is the highest conductance state in the potentiation,  $G_{\text{LGS}_p}$  is the lowest conductance state in the potentiation,  $G_{\text{present}}$  is the present conductance state,  $a_p$  is the degree of deflection of the fitted curve from the measured data in the potentiation, and  $G_{\text{LRS}_d}$ ,

$G_{HRSd}$ ,  $a_d$  are applied to the case of depression. Table S2 provides the parameters used in this device-to-system simulation.

**Table S2.** Summarized fitting parameters.

|       | $G_{LGSp}$ | $G_{HGSp}$ | $a_p$ | $G_{LRSd}$ | $G_{HRSd}$ | $a_d$ |
|-------|------------|------------|-------|------------|------------|-------|
| value | 517        | 191        | 1.2   | 517        | 191        | -4.8  |

To simulate the leaky integrator, the integrated  $I_{post}$  was modeled using the following equation:

$$\tau \frac{dX}{dt} + X = I_{post},$$

where the state variable ( $X$ ) is the output voltage of the integrator, and  $\tau$  is a leak-time constant (= 100  $\mu$ s).

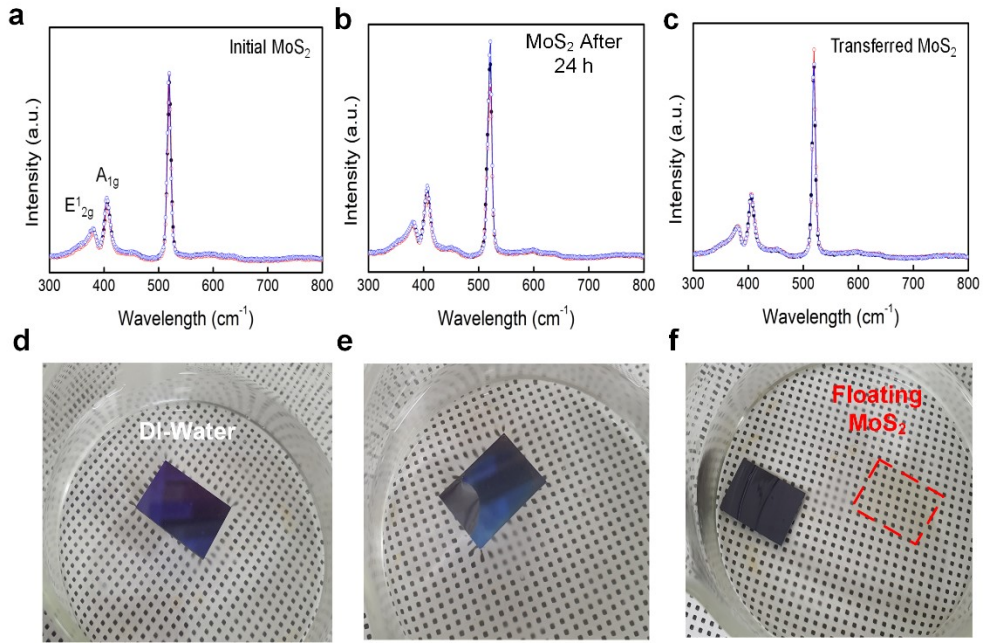

**Fig. S20** (a) initial MoS<sub>2</sub> layer, (b) MoS<sub>2</sub> layer aged for 24 hours, and (c) transferred MoS<sub>2</sub> layer onto SiO<sub>2</sub>/Si wafer. Images of MoS<sub>2</sub> layer transfer process which show (d) dipping the MoS<sub>2</sub>/SiO<sub>2</sub>/Si sample in the DI-water, (e) separated MoS<sub>2</sub> layer from SiO<sub>2</sub>/Si wafer, and (f) floating MoS<sub>2</sub> layer.

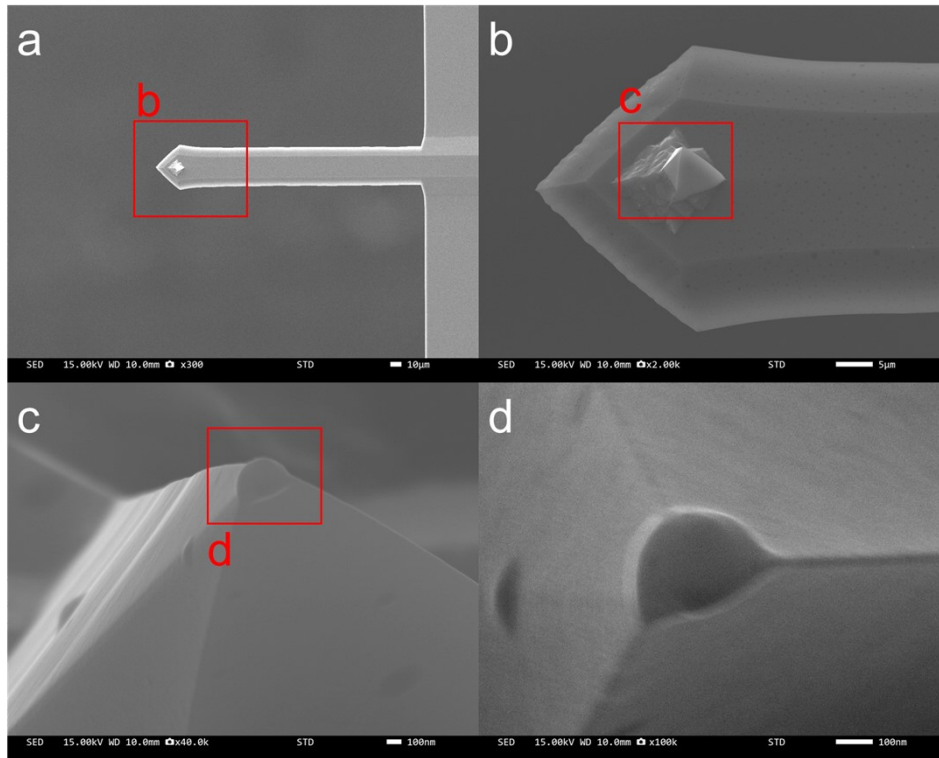

**Fig. S21** SEM images of the cantilever tip used in CAFM measurement with a magnification of (a)  $\times 300$ , (a)  $\times 2,000$ , (a)  $\times 40,000$ , and (a)  $\times 100,000$ .

## Reference

1. Yan, X. B., Zhao, Q. O. L., Chen, A. P., Zhao, J. H., Zhou, Z. Y., Wang, J. J., Wang, H., Zhang, L., Li, X. Y., Xiao, Z. A., Wang, K. Y., Qin, C. Y., Wang, G., Pei, Y. F., Li, H., Ren, D. L., Chen, J. S., Liu, Q. *Small*, 2019, **15**, 1901423.
2. Zhou, Y., Liu, D. N., Wang, J. H., Cheng, Z. Q., Liu, L., Yang, N., Liu, Y. X., Xia, T., Liu, X. Y., Zhang, X., Ye, C., Xu, Z., Xiong, W., Chu, P. K., Yu, X. F. *Acs Appl. Mater. Inter.* 2020, **12**, 25108.
3. Wang, B. L., Luo, H., Wang, X. W., Wang, E. Z., Sun, Y. F., Tsai, Y. C., Zhu, H., Liu, P., Jiang, K. L., Liu, K. *ACS Nano* 2020, **14**, 175.
4. Xu, R. J., Jang, H., Lee, M. H., Arnanov, D., Cho, Y., Kim, H., Park, S., Shin, H. J., Ham, D. *Nano Lett.* 2019, **19**, 2411.
5. Cheng, P. F., Sun, K., Hu, Y. H. *Nano Lett.* 2016, **16**, 572.
6. Zhu, K. C., Liang, X. H., Yuan, B., Villena, M. A., Wen, C., Wang, T., Chen, S. C., Hui, F., Shi, Y. Y., Lanza, M. *ACS Appl. Mater. Inter.* 2019, **11**, 37999.
7. Son, D., Chae, S. I., Kim, M., Choi, M. K., Yang, J., Park, K., Kale, V. S., Koo, J. H., Choi, C., Lee, M., Kim, J. H., Hyeon, T., Kim, D. H. *Adv. Mater.* 2016, **28**, 9326.
